14 **Abstract**

15 Combining scientific data over a long-time period is necessary to understand the diversity,  
16 population trends, and conservation importance of any taxa in a global and regional scale.  
17 Bangladesh is located in a biodiversity hotspot region, however, till date, only few animal  
18 groups has been extensively investigated at a nation-wide scale. Although being one of the  
19 earliest and well-known insect groups, the knowledge on Odonata of this region remains  
20 rudimentary and dispersed. To resolve this issue, we have developed an online database for  
21 the Odonata of Bangladesh. We have compiled data from our last four years field study, from  
22 previously published research articles, field guides, and also collected data from citizen  
23 scientists regarding Bangladeshi odonates. Odonata of Bangladesh database  
24 (<http://www.odobd.org>) contains information on morphology, abundance, gene and protein  
25 sequences, local and global distribution and conservation status of the Odonata of  
26 Bangladesh. The database also demonstrates gender specified photographs with descriptions  
27 for better understanding for the novice researchers and naturalists. Odonata of Bangladesh  
28 database provides a comprehensive source for meta-analyses in ecology, conservation  
29 biology, and genetic research.

30

31

32 **Keywords**

33 Dragonfly; Damselfly; OdoBD; Odonata of Bangladesh; Citizen Science

34

35

## 36 **Introduction**

37 The inscription of natural organisms can be regarded as one of the most valuable documents  
38 in the study of historical occurrence of organisms. Although museum records, which serve as  
39 a credible source of information about the diversity of biological organisms, keep voucher  
40 specimens; comparing and contrasting all these records from different geographical locations  
41 for large-scale analysis prove to be an exceedingly difficult task. To confront this challenge,  
42 different types of digital catalogs started to be developed since 1970. A number of  
43 consolidated online databases like VertNet (Guralnick & Constable 2010), iNaturalist  
44 (<http://www.inaturalist.org/>), IUCN Red List (<http://www.iucnredlist.org/>), and Atlas of  
45 Living Australia (<https://www.ala.org.au/>), with their geographical, physiological and  
46 biochemical information, are proving to be an essential source for large-scale analysis  
47 conducted by scientists and researchers from all around the globe (Pyke & Ehrlich 2010). The  
48 online databases focusing on invertebrates, especially insects are, however, lagging far  
49 behind (Schuh *et al.* 2010). Although, this number is gradually increasing by the day as more  
50 insect data are being digitized in online repositories like OdonataCentral (Abbott & Broglie  
51 2005), AllOdonata (<http://www.allodonata.com/>), FreshWaterBiodiversity  
52 (<http://data.freshwaterbiodiversity.eu/>), and Global Biodiversity Information Facility  
53 (<http://www.gbif.org/>), in response to the growing needs worldwide. Along with these online  
54 databases containing information on species worldwide, regional databases like Butterflies of  
55 India (Kunte *et al.* 2018), Butterflies of Belgium (Maes *et al.* 2016) are currently emerging,  
56 providing more detailed insights on the extant species with their spatial and temporal  
57 information.

58 The order Odonata is one of the earliest and well-known insect groups, existing on all  
59 continents except Antarctica (Trueman 2007). These insects predominantly inhabit the  
60 tropical and subtropical climate zones (Dumont 1991). Adult Odonates are terrestrial in

61 nature, found adjacent to water sources, whereas the immature stages are aquatic, inhabiting  
62 freshwater habitats of all kinds, ranging from permanent running waters like rivers and lakes  
63 to small temporary rain pools and puddles. Being a species specific to a certain type of  
64 habitat makes them an ideal candidate for monitoring the health of freshwater ecosystems.  
65 The taxonomic Order Odonata is divided into three suborders – Anisoptera, which  
66 encompasses dragonflies; Zygoptera, which includes damselflies; and Anisozygoptera,  
67 which contains intermediary species between these two groups. Till now, A total of 6,265  
68 species of Odonates under 600 genera have been reported globally (Schorr & Paulson 2018).  
69 A combined effort has been undertaken to digitize all the information available on the  
70 odonata worldwide, in order to make them readily available to the interested scientific  
71 community (Schorr & Paulson 2018). Additionally, there have been region-specific studies  
72 on the odonates in different parts of the world, specifically countries with a diverse range of  
73 Odonata (Joshi *et al.* 2018; Kipping *et al.* 2009).

74 Bangladesh is a small country with high Odonata diversity. Currently, more than a  
75 hundred species are known from Bangladesh. The largely unconsolidated information makes  
76 large-scale analysis and research involving Bangladeshi Odonates particularly challenging.  
77 Thus, we have developed an online database of all the known Odonates from different  
78 locations of Bangladesh to generate an integrated and widely accessible source to facilitate  
79 studies of ecology, conservation, and genetic analysis. Currently, we have amassed  
80 information of 103 different species from all over the country. The database, named Odonata  
81 of Bangladesh (<http://www.odobd.org>), contains information on morphology, habitat,  
82 abundance, gene and protein sequences, worldwide distribution and conservation status of the  
83 Bangladeshi Odonates and is updated on a regular basis. We have included gender specified  
84 photographs with descriptions for better understanding for the novice researchers and

85 naturalists. This database will spread the knowledge of the Bangladeshi Odonates as well as  
86 will enhance the opportunities for ecological and genetic research on those species.

87

## 88 **Methods**

### 89 **Geographic coverage**

90 The database Odonata of Bangladesh assimilated geographical data of the Bangladeshi  
91 odonates from the whole country. For the development of the database, we have divided the  
92 country into seven major regions, namely Dhaka, Rangpur, Rajshahi, Sylhet, Chittagong,  
93 Barisal, and Khulna (Figure: 01). Our study was mainly focused on four specific regions  
94 serving as Odonata breeding hotspots – Dhaka, Sylhet, Chittagong and Khulna; which  
95 correspond to the central, north-eastern, south-eastern and south-western part of the country,  
96 respectively. These regions encompass nearly all of the distinct climates and waterbodies of  
97 the country. We did regular surveys throughout the year for the last four years (2012-2016) in  
98 those regions and updated the checklist, parts of which have been published previously (Khan  
99 2015a, 2015b, 2017; Khan & Tuhin 2018). We incorporated our unpublished data and data  
100 from published research for those regions in the database as well. We collected data of the  
101 Odonata on the other parts of Bangladesh from our occasional surveys, from the data  
102 deposited by the citizen scientists in our database and from the previously published research  
103 articles.

104

### 105 **Photographs**

106 We captured most of the photos deposited on the database in the last four years (2012-2016).  
107 We captured various identification features of the dragonflies by a Canon 600D camera using  
108 a 55–250 mm lens. Most of the photos were taken in natural habitats from 0800-1700 hours  
109 (Khan 2015a). A few species were also photographed from previously collected specimens

110 (Khan 2015a, 2015b). In addition to our photo database, we have also collected photo  
111 evidence from citizen scientists, providing their credit in the photos. We identified the  
112 photographs of the dragonflies using the identification keys and distinguishing features  
113 developed by the earlier entomologists (Asahina 1967; Fraser 1933, 1934, 1936; Lahiri 1987;  
114 Mitra 2002; Nair 2011; Subramanian 2009). We collected photographs of males and females  
115 and their different color morphs. We also took photographs of their life history such as  
116 emerging, perching, foraging, mating, oviposition, territorial fight etc.

117

### 118 **Data resources**

119 Flight season, abundance and preferred eco-system were surveyed on these species to portray  
120 the regional diversity and prevalence. In all subsequent analyses, any species considered to be  
121 vagrant, with only one sighting was removed. Common name, IUCN status and global  
122 distribution data were collected from International Union for Conservation of Nature and  
123 Natural Resources database (<http://www.iucnredlist.org/>). In conjunction with the  
124 information, gender-specific morphological features like abdomen and wing size, distinct  
125 wing spots and colors were added from our literature review (Nair 2011; Subramanian &  
126 Gadgil 2009). For the purpose of genomic and proteomic studies, gene and protein sequences  
127 were also included in the database. As genomic and proteomic studies of odonates are  
128 understudied, the number of sequenced genes and proteins is very low. We included the most  
129 sequenced gene in the odonates cytochrome oxidase and its corresponding protein  
130 cytochrome c oxidase (EC 1.9.3.1) to study the phylogenic relationships. The gene and  
131 protein sequences for the species were collected from The National Center for Biotechnology  
132 Information database (<http://www.ncbi.nlm.nih.gov/>), UniProt database  
133 (<http://www.uniprot.org/>). Furthermore, we have included all the previous studies done on  
134 odonates in this region along with local field guides, in our bibliography section.

135

## 136 **Data structure**

137 The OdoBD database contains records of species occurrences with their location and flight  
138 season. Taxonomic, ecological, and physiological information of Bangladeshi Odonata are  
139 included in the database. The gene and protein sequences, that are currently available, are  
140 also stored and provided in a separate tab. Thus, the following data are stored for each  
141 accession: Taxonomy, classification, general information (common name, scientific name,  
142 abundance, flight season, local and global distribution, and IUCN status, description, and  
143 gene and protein sequences. Photographs of male, female, foraging and reproductive  
144 behavior (copula, oviposition, tandem) are provided when available. A map of local  
145 distribution of each species is also included. General information on the difference between  
146 dragonfly and damselfly, their morphology, habitat, reproductive behavior, predator and prey  
147 interrelationship and conservation status are included under category 'Biology'. The  
148 bibliography section was updated with a list of the previously published article on the  
149 Odonata fauna of Bangladesh. A common portal was created for citizen scientists to interact  
150 with the OdoBD database management team to submit sightings of the Odonata of  
151 Bangladesh.

152

## 153 **Database design**

154 The MySQL database runs on a Percona server (webserver cpsrvd ver.11.x). Data are stored  
155 in the relational tables of a MySQL ver. 5.x database. A graphical user interface (GUI)  
156 named phpMyAdmin (v4.3.8) was installed in the server for managing MySQL tables and  
157 data. The GUI is accessible through all class of browsers regardless of operating system,  
158 though it has been most intensively tested using Mozilla Firefox and Google Chrome.

159

160 **Results**

161 **Taxonomic Coverage**

162 Kingdom: Animalia

163 Class: Insecta

164 Order: Odonata

165 Suborders: Anisoptera; Zygoptera

166 Families: Aeshnidae, Gomphidae, Libellulidae, Macromiidae; Calopterygidae,  
167 Chlorocyphidae, Coenagrionidae, Euphaeidae, Lestidae, Platycnemididae

168 Genera: *Anaciaeschna*, *Anax*, *Gynacantha*, *Ictinogomphus*, *Macrogomphus*,  
169 *Megalogomphus*, *Orientogomphus*, *Paragomphus*, *Acisoma*, *Aethriamanta*, *Brachydiplax*,  
170 *Brachythemis*, *Bradinopyga*, *Camacinia*, *Cratilla*, *Crocothemis*, *Diplacodes*, *Hydrobasileus*,  
171 *Indothemis*, *Lathrecista*, *Lyriothemis*, *Macrodiplax*, *Neurothemis*, *Onychothemis*, *Orthetrum*,  
172 *Palpopleura*, *Pantala*, *Potamarcha*, *Rhodothemis*, *Rhyothemis*, *Tetrathemis*, *Tholymis*,  
173 *Tramea*, *Trithemis*, *Urothemis*, *Zyxomma*, *Epophthalmia*; *Matrona*, *Neurobasis*, *Vestalis*,  
174 *Aristocypha*, *Libellago*, *Aciagrion*, *Agriocnemis*, *Amphiallagma*, *Argiocnemis*, *Calicnemia*,  
175 *Ceriagrion*, *Ischnura*, *Mortonagrion*, *Paracercion*, *Pseudagrion*, *Dysphaea*, *Euphaea*, *Lestes*,  
176 *Coeliccia*, *Copera*, *Onychargia*, *Prodasineura*

177

178 **Database summary**

179 There was a total number of 103 species recorded from all over the country during the study  
180 period. The number of recorded Anisoptera (Dragonfly) was 58; in which the family  
181 Libellulidae (the skimmers or perchers) were the greatest in number with 45 species on  
182 record and the family Aeshnidae (the hawkers) and Gomphidae (clubtail dragonflies) had 6  
183 species each (Figure 2). *Epophthalmia vittata* was the only existing dragonfly in this region  
184 belonging to the family Macromiidae. The number of Zygoptera (Damsel fly) was 45; where



185 species of six different families were found (Figure 2). The family with the highest  
186 documented species was Coenagrionidae with 27 species and the family with least recorded  
187 species was Lestidae with only one species (*Lestes praemorsus*). Another low diverse  
188 recorded family was Chlorocyphidae with two species only. The family Calopterygidae and  
189 Euphaeidae had three recorded species each whereas nine species were recorded from  
190 Platynemididae family. The sub-order Anisozygoptera, which contains intermediary  
191 species between these two groups, has only two living species and none of them are found in  
192 Bangladesh.

193         Currently, the database contains male specific photos of 83 species and 49 species'  
194 female specific photos. Additional photos like perching, mating, oviposition are also  
195 included. Photos of rest of the species will gradually be added upon their availability.

196

### 197 **Temporal summary and conservation status**

198 Among the seven divided divisions, Sylhet and Chittagong were found to be regions with the  
199 most species diversity. In Sylhet around 54 and in Chittagong around 45 different Anisoptera  
200 species were encountered (Figure 3). For Zygoptera, there were 34 encounters in Sylhet and  
201 36 in Chittagong. Dhaka and Khulna have a moderate level of species diversity with a total  
202 sighting of 48 and 49 different odonate species respectively (Figure 3). The rest of the three  
203 regions have a lower number of species sightings. The species *Anax indicus* was only spotted  
204 in Rajshahi and Sylhet. *Macrodiplax cora* species was only seen in Chittagong and Khulna.

205         The IUCN Red List status analysis showed, among the documented 101 species, 93  
206 belongs to Least Concern (LC) category of which 51 species were Anisoptera whereas 42  
207 were Zygoptera (Figure 4). Seven species were recorded under the category of Data Deficient  
208 (DD), in which all the species belonged to the sub-order Anisoptera (Aeshnidae 2 and  
209 Gomphidae 4). One documented species *Indothemis carnatica* belongs to Near Threatened

210 (NT). The rest of the two Zygoptera species, namely *Matrona nigripectus* and *Agriocnemis*  
211 *Kalinga*, have not yet been assessed by IUCN.

212 The frequency of sightings was observed for each species and is stated accordingly in  
213 the database. 51 species were found to be common in their respective zones, among *A.*  
214 *kalinga* is stated as not assessed by IUCN. Uncommon occurrence was noted for 25 species.  
215 Three species were locally common (*Cratilla lineata*, *Macrodiplax cora*, *Calicnemia*  
216 *imitans*). 19 species were found to be rarely occurring, in which four have Data Deficient and  
217 one species is nearly threatened. Three species were sighted in extremely rare cases where all  
218 three of them possess the Data Deficient status.

219

## 220 **Flight season and Genetic data**

221 Among the 103 species, the flight season data was collected for 101 species. Due to the  
222 geographical location, Bangladesh has a temperate climate and has six seasons. Each season  
223 is comprised of two months, some of them are short while some flow into other seasons. The  
224 six seasons and their ranges are – Summer (April-May), Monsoon (June-July), Autumn  
225 (August-September), Late Autumn (October-November), Winter (December-January) and  
226 Spring (February-March). Eleven species were found to be abundant all year long. The  
227 sightings of odonates, peak with the maximum in the month of June, which is the starting of  
228 the season monsoon, and continues until October, that is the mid of late autumn (Figure 5).  
229 Their prevalence starts to decline with the least number of sightings during the winter season.

230 The genetic and proteomic data were collected from The National Center for  
231 Biotechnology Information database (<http://www.ncbi.nlm.nih.gov/>) and the UniProt  
232 database (<http://www.uniprot.org/>) for the gene and protein sequences. Sequences for the  
233 gene cytochrome oxidase and its corresponding protein cytochrome c oxidase (EC 1.9.3.1)  
234 for the available species (Currently 67 gene and protein sequences each) are continuously

235 being incorporated into the database with their accession id as soon as they are made  
236 available on the different public databases.

237

### 238 **Data accuracy and future updates**

239 The data in OdoBD were entered by the first author (MNAS). Then entries were double-  
240 checked completely or spot-checked with a random sub-sample by MKK. Over 95% of such  
241 double-checked entries were correct. However, not all data entries were verified by a second  
242 person. Thus, some low level of data entry errors remains. Technical support and web  
243 development were done by MNAS and Borhan Uddin. Although the study time period  
244 mentioned was from 2012-2016, reports and sightings from 2017 onwards are still being  
245 recorded for this database and recent articles are being added whenever they are made  
246 available. We will continue to use feedback from peer reviewers and users of the database, to  
247 update and correct the database.

248

### 249 **Discussion**

250 The storage and accession of the large amount of data for scientific research can be attained  
251 by the means of the universal electronic database. This database ‘OdoBD’ can be the source  
252 for various researchers for the faunistic, biogeographic and systemized research on the  
253 odonates of Bangladesh. It is also useful for spatial research on the odonata fauna as it  
254 encompasses numerous parameters like preferred eco-system, relative abundance, flight  
255 season, local and global distribution for each species. With the aid of different tools from the  
256 Geographical Information System (GIS), it is now possible to generate distribution maps of  
257 each species across a large area that can facilitate further research (Wadsworth & Treweek  
258 1999). For Bangladesh, no such study along with data digitization has been carried out to

259 date. We report this database as the first online and readily accessible checklist on odonata  
260 with additional information on each species from Bangladesh.

261 Our current compiled list of 103 species of odonata substantiates the rich faunal  
262 diversity of the country. Among the seven divisions, the most number of species was  
263 recorded in Sylhet and Chittagong, which contains most diverse water resources and also till  
264 date most of the study were concentrated in this region. Dhaka and Khulna have a moderate  
265 number of species diversity. The rest of the three regions – Rangpur, Rajshahi, and Barisal  
266 were documented with lowest species diversity. This low Odonata diversity can be attributed  
267 to the availability of the small amount of fresh water habitat and low data availability from  
268 these regions.

269 The Odonata database gathered data from grey literature, field guides, published  
270 articles and collected data from citizen scientists. There is a constant effort to keep the  
271 information updated along with their improved comprehensiveness, but biodiversity data are  
272 often quite sparse and can be geographically biased (Collen *et al.* 2008; Yesson *et al.* 2007).  
273 In cases, many of the data-collection sources under-represent certain areas that are in species-  
274 rich tropics. The lack of museum records on odonates in this region poses another big  
275 challenge in the acquisition of authentic documentations. Harnessing citizen science in these  
276 under-studied regions to monitor and document Odonata biodiversity can vastly improve our  
277 current knowledge on these species (Silvertown 2009). The rapid expansion of the Internet  
278 and advancement of mobile computing have accelerated the number of citizen science  
279 projects in recent years. This platform has the potential to facilitate the collection and  
280 circulation of taxonomic data covering a wide geographical area at minimal expenditure. Our  
281 database provides such a platform for the contributions from citizen scientists across the  
282 nation. The species submission portal allows the users to enter data with photographic  
283 evidence that are directly sent to the online server. Unusual sightings are flagged and are

284 forwarded to the editors. After verification, the new data are fed into the OdoBD database.  
285 The regions with poor data coverage are expected to be well documented with the help of  
286 enthusiastic citizen scientists.

287 The species data compiled with their respective eco-regions have a number of  
288 conservation applications. Conservation efforts can be undertaken at the regional scale using  
289 the eco-regions to distinguish distinct units of freshwater biodiversity. Our database may  
290 provide a crucial framework for identifying biogeographic locations that have the potential  
291 for being nominated as wetlands of international importance and are in need of protection.  
292 Similar processes to establish representative networks of protected freshwater areas by using  
293 eco-regions as a proxy, have been called for by IUCN World Conservation Congress, World  
294 Parks Congress and Convention on Biological Diversity (Abell *et al.* 2008). By compiling the  
295 list of less abundant, data deficient and near threatened species of Bangladesh our odonata  
296 database narrowed down the species required conservation attention. The main challenge  
297 remains the translation of these analyses into conservation implementation at local and  
298 national scales (da Fonseca *et al.* 2000). Conducting workshops providing local participants  
299 with biodiversity data to set up a consensus on individual conservation priorities is one of the  
300 most promising strategies for addressing the issue (Mittermeier *et al.* 1995).

301 In our study, we used the well-studied order of insects, Odonata, to construct a  
302 database of extant species in Bangladesh with their physical, ecological and genetic  
303 information. This database presents a useful source of information in determining the current  
304 state of Odonata communities in the region along with changes in species distribution. One of  
305 the major applications of this database is that it can be utilized as a data-exploration tool for  
306 comparative analysis. Comparison of odonata data from different regions may provide strong  
307 indications for global changes in biology as well as the underlying biological mechanisms for  
308 different habitat preferences of the odonates.

309

## 310 **Acknowledgements**

311 We thank Ken Cheng for his comment on the earlier version of the manuscript. The  
312 digitization of the Odonata collection is supported by The Rufford Foundation, UK [grant  
313 number 18697-1] and The Explorers Club, USA. We also thank all the people, volunteers and  
314 citizen scientists for their help in the field-work, observations, sample collection and logistic  
315 support. We specially thank Borhan Uddin for helping us in the digitization of our dataset.

316

## 317 **Declarations**

318 **Ethics approval and consent to participate:** Not applicable

319 **Financial interest or benefit:** Not applicable

320

## 321 **Funding**

322 This study was funded by The Rufford Foundation [grant number 18697-1], UK and The  
323 Explorers Club, USA.

324

## 325 **References**

326 Abbott JC & Broglie D. 2005. OdonataCentral. com: a model for the web-based delivery of  
327 natural history information and citizen science. *Dragonflies and Damselflies*

328 *(Odonata) of Texas* 1(8).

329 Abell R, Thieme ML, Revenga C, Bryer M, Kottelat M, Bogutskaya N, Coad B, Mandrak N,

330 Balderas SC, Bussing W & Stiassny ML. 2008. Freshwater ecoregions of the world: a

331 new map of biogeographic units for freshwater biodiversity conservation. *BioScience*

332 58(5): 403–414.

- 333 Asahina S. 1967. A Revision of Asiatic Species of Damselflies of Genus *Ceriagrion* (Odonata  
334 *Agrionidae*). *Japanese Journal of Zoology* 15(3): 255.
- 335 Collen B, Ram M, Zamin T & McRae L. 2008. The tropical biodiversity data gap: addressing  
336 disparity in global monitoring. *Tropical Conservation Science* 1(2): 75–88.
- 337 da Fonseca GA, Balmford A, Bibby C, Boitani L, Corsi F, Brooks T, Gascon C, Olivieri S,  
338 Mittermeier RA, Burgess N & Dinerstein E. 2000. ... following Africa's lead in  
339 setting priorities. *Nature* 405(6785): 393.
- 340 Dumont HJ. 1991. *Odonata of the Levant*. (Vol. 5). Israel academy of sciences and  
341 humanities.
- 342 Fraser F. 1933. *Odonata. The Fauna of British India including Ceylon and Burma* (Vol. I).  
343 Taylor and Francis, London.
- 344 Fraser F. 1934. *Odonata. The Fauna of British India including Ceylon and Burma* (Vol. II).  
345 Taylor and Francis, London.
- 346 Fraser F. 1936. *Odonata. The Fauna of British India including Ceylon and Burma* (Vol. III).  
347 Taylor and Francis, London.
- 348 Guralnick R & Constable H. 2010. VertNet: creating a data-sharing community. *BioScience*  
349 60(4): 258–259.
- 350 Joshi S, Dawn P, Roy P & Kunte K. 2018. Odonata of India. *Indian Foundation for*  
351 *Butterflies*. URL: <http://www.indianodonata.org/>
- 352 Khan MK. 2015a. Dragonflies and damselflies (Insecta: Odonata) of the northeastern region  
353 of Bangladesh with five new additions to the Odonata fauna of Bangladesh. *Journal*  
354 *of Threatened Taxa* 7(11): 7795–7804.
- 355 Khan MK. 2015b. *Gynacantha subinterrupta* Rambur, 1842: an addition to the odonates  
356 (Insecta: Odonata: Aeshnidae) of Bangladesh. *Journal of Threatened Taxa* 7(10):  
357 7704–7705.

- 358 Khan MK. 2017. Odonata diversity of the eastern region of Bangladesh with four new  
359 addition to the Bangladeshi dragonfly fauna. *BioRxiv* 195438.  
360 <https://doi.org/10.1101/195438>
- 361 Khan MK. & Tuhin MSH. 2018. Species richness, habitat association and odonata diversity  
362 of the south-western region of Bangladesh. *BioRxiv* 252890.  
363 <https://doi.org/10.1101/252890>
- 364 Kipping J, Dijkstra KDB, Clausnitzer V, Suhling F & Schütte K. 2009. Odonata database of  
365 Africa (ODA). *Agrion* 13: 20–23.
- 366 Kunte K, Sondhi S & Roy P. 2018. Butterflies of India, v. 2.35. Indian Foundation for  
367 Butterflies.
- 368 Lahiri A. 1987. Studies on the odonate fauna of Meghalaya. *Records of the Zoological Survey*  
369 *of India* 99: 1-402.
- 370 Maes D, Vanreusel W, Herremans M, Vantieghem P, Brosens D, Gielen K, Beck O, Van  
371 Dyck H, Desmet P & Natuurpunt V. 2016. A database on the distribution of  
372 butterflies (Lepidoptera) in northern Belgium (Flanders and the Brussels Capital  
373 Region). *ZooKeys* (585): 143.
- 374 Mitra TR. 2002. *Geographical distribution of Odonata (Insecta) of eastern India*. Zoological  
375 Survey of India.
- 376 Mittermeier R, Bowles I, Cavalcanti R, Olivieri S & Da Fonseca G. 1995. A participatory  
377 approach to biodiversity conservation: the regional priority setting workshop.  
378 *Conservation International, Washington, DC*.
- 379 Nair MV. 2011. *Dragonflies & Damselflies of Orissa and Eastern India*. Wildlife  
380 Organisation, Forest & Environment Department, Government of Orissa.



- 381 Pyke GH & Ehrlich PR. 2010. Biological collections and ecological/environmental research:  
382 a review, some observations and a look to the future. *Biological Reviews* 85(2): 247–  
383 266.
- 384 Schorr M & Paulson D. 2018. World Odonata List. *Accessed on 28 Dec 2018 URL:*  
385 [https://www.pugetsound.edu/academics/academic-resources/slater-](https://www.pugetsound.edu/academics/academic-resources/slater-museum/biodiversity-resources/dragonflies/world-odonata-list/)  
386 [museum/biodiversity-resources/dragonflies/world-odonata-list/](https://www.pugetsound.edu/academics/academic-resources/slater-museum/biodiversity-resources/dragonflies/world-odonata-list/)
- 387 Schuh RT, Hewson-Smith S & Ascher JS. 2010. Specimen databases: A case study in  
388 entomology using Web-based software. *American Entomologist* 56(4): 206–216.
- 389 Silvertown J. 2009. A new dawn for citizen science. *Trends in Ecology & Evolution* 24(9):  
390 467–471. <https://doi.org/10.1016/j.tree.2009.03.017>
- 391 Subramanian K. 2009. A checklist of Odonata (Insecta) of India. *Zoological Survey of India*,  
392 36pp.
- 393 Subramanian KA & Gadgil M. 2009. *Dragonflies of India, a field guide*. Vigyan Prasar.  
394 Retrieved from [http://agris.fao.org/agris-](http://agris.fao.org/agris-search/search.do?recordID=US201300155737)  
395 [search/search.do?recordID=US201300155737](http://agris.fao.org/agris-search/search.do?recordID=US201300155737)
- 396 Trueman J. 2007. A brief history of the classification and nomenclature of Odonata. *Zootaxa*  
397 1998: 381-394. <https://doi.org/10.11646/zootaxa.1668.1.20>
- 398 Wadsworth R & Treweek J. 1999. *GIS for Ecology*. Addison Wesley Longman.
- 399 Yesson C, Brewer PW, Sutton T, Caithness N, Pahwa JS, Burgess M, Gray WA, White RJ,  
400 Jones AC, Bisby FA & Culham A. 2007. How global is the global biodiversity  
401 information facility? *PloS One* 2(11): e1124.  
402 <https://doi.org/10.1371/journal.pone.0001124>  
403  
404

405 **Figure Legends**

406

407 **Figure 1:** A reference map of different divisions of Bangladesh.

408 **Figure 2:** Number of extant species of different families of Odonates. White bars represent  
409 the sub-order Anisoptera and Grey bars represent the sub-order Zygoptera.

410 **Figure 3:** Number of extant species in different regions of Bangladesh. White bars represent  
411 the sub-order Anisoptera and Grey bars represent the sub-order Zygoptera.

412 **Figure 4:** The IUCN status of different existing species in Bangladesh. White bars represent  
413 the sub-order Anisoptera and Grey bars represent the sub-order Zygoptera.

414 **Figure 5:** Number of species based on their flight pattern in different seasons of Bangladesh.  
415 White bars represent the sub-order Anisoptera and Grey bars represent the sub-order  
416 Zygoptera.

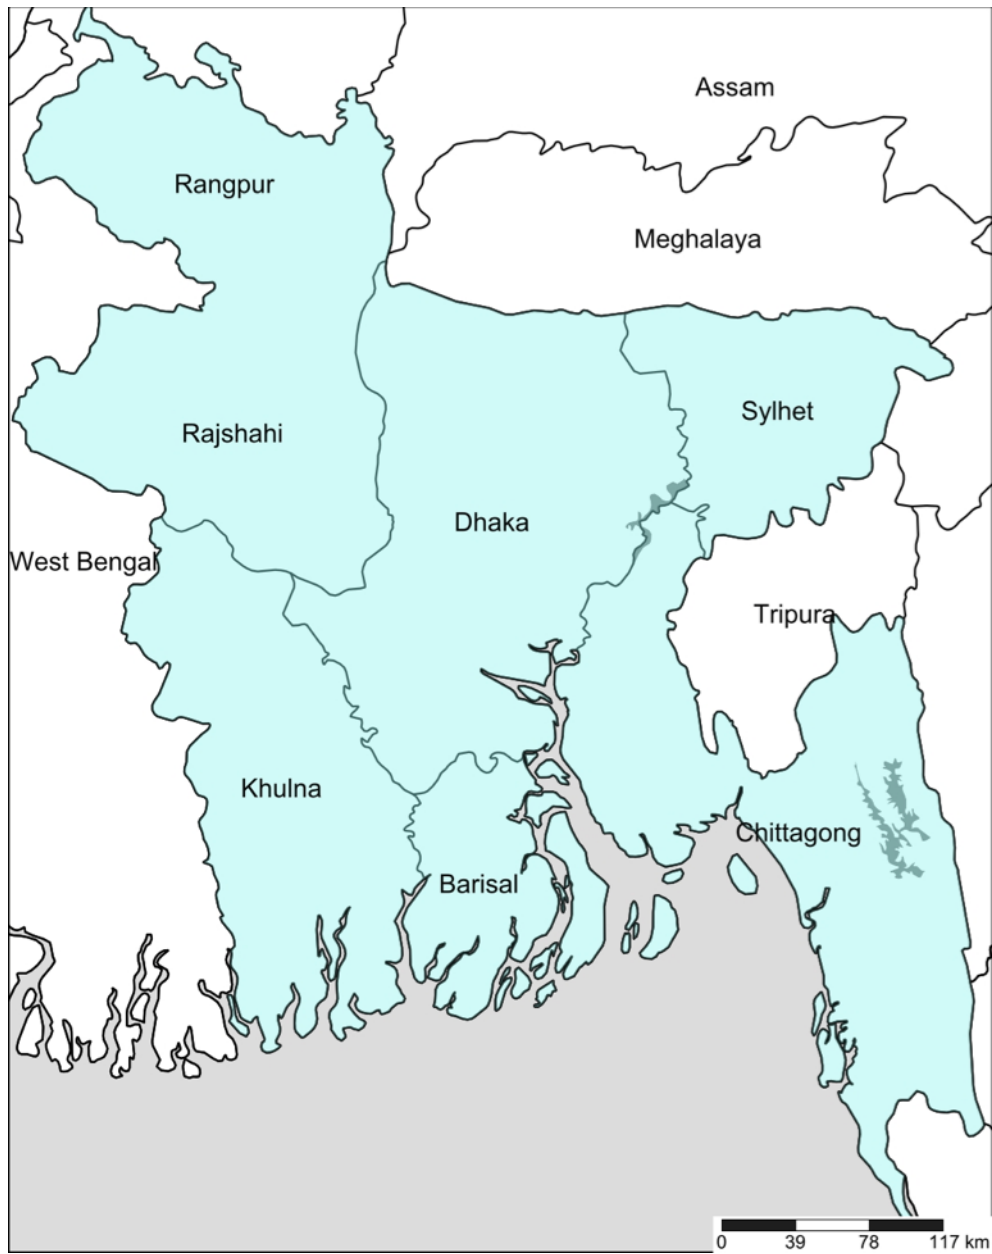

417

418

**Figure 1**

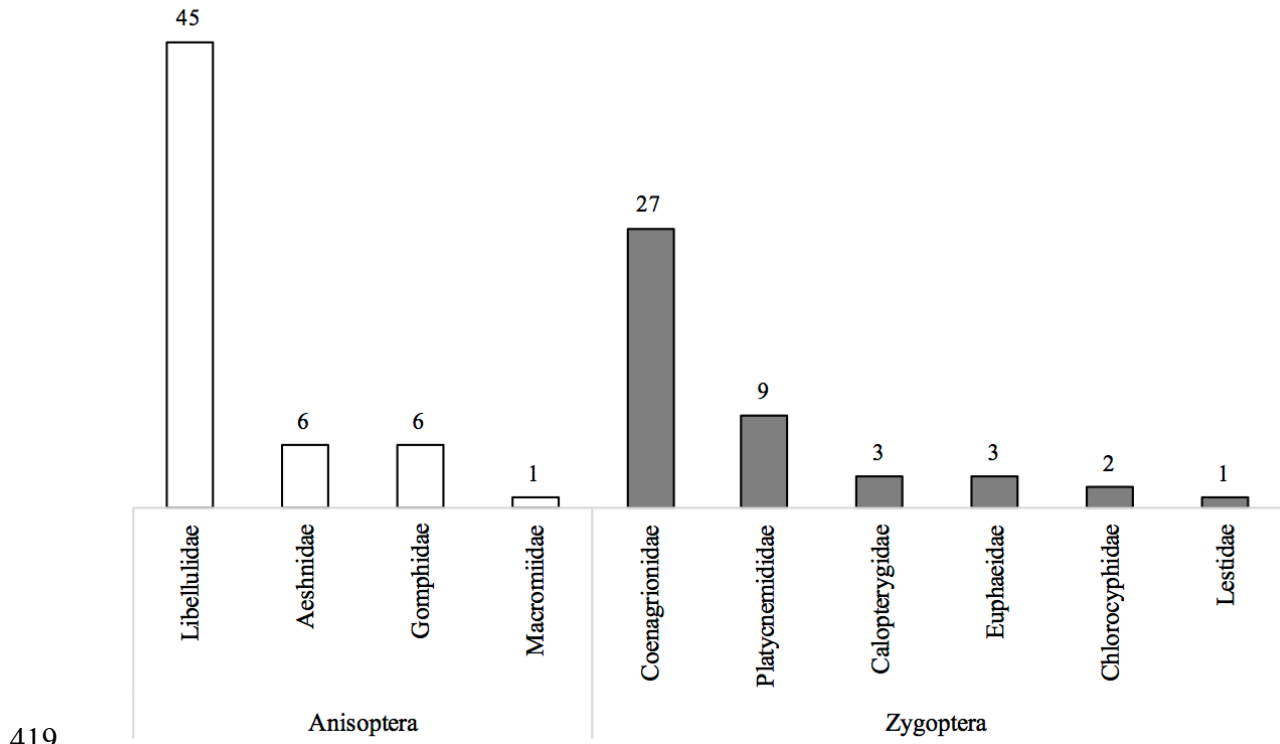

419

420

**Figure 2**

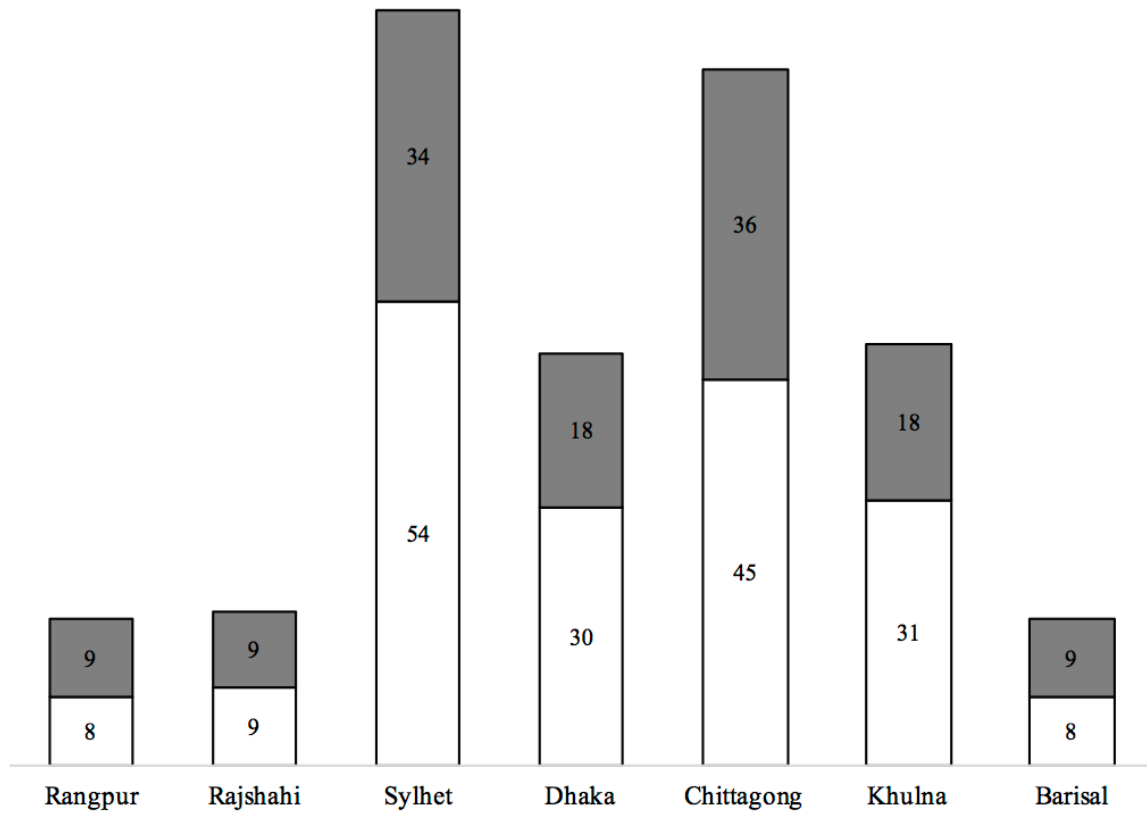

421

422

**Figure 3**

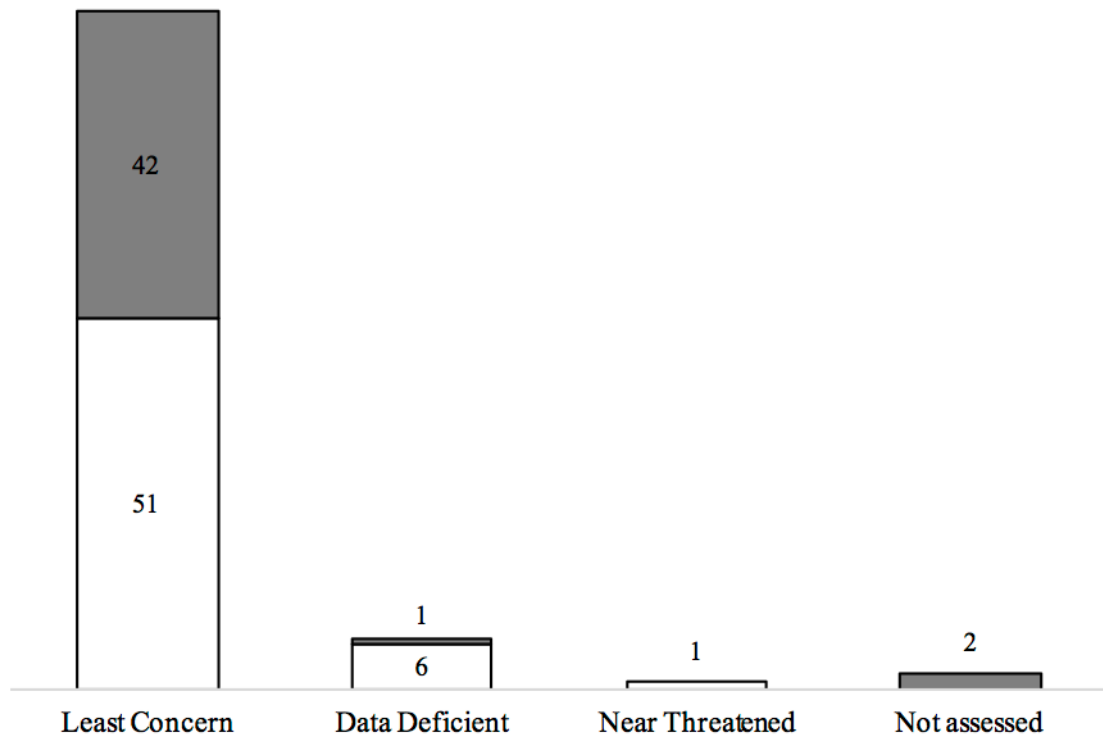

423

424

**Figure 4**

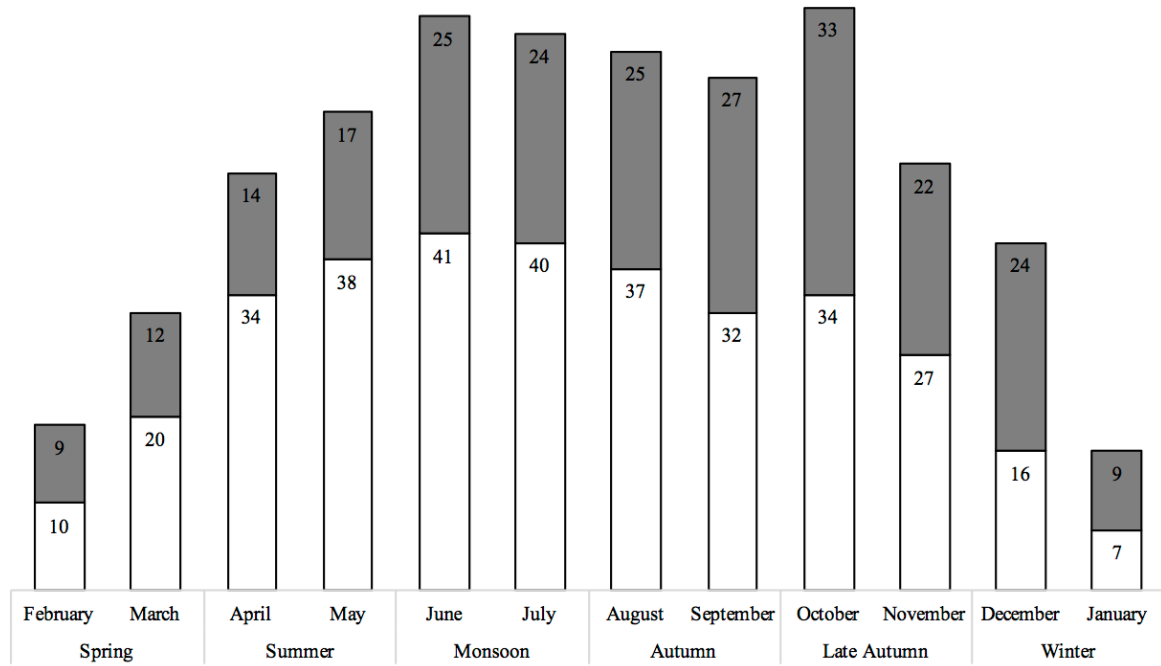

425

426

**Figure 5**
